# Supplementary material for: Amyloid β-peptides interfere with mitochondrial preprotein import competence by a coaggregation process
Source: PubMed Central journal article supplement — Mol Biol Cell. 2016 Nov 1;27(21):3257–72. doi: 10.1091/mbc.E16-05-0313 (PMC5170859; doi:10.1091/mbc.e16-05-0313), 2016-11-01
Supplement: supp_E16-05-0313v1_CombinedSupMats.pdf [file supp_E16-05-0313v1_CombinedSupMats.pdf]

# Supplemental Materials

*Molecular Biology of the Cell*

Cenini et al.

Cenini, G. et al.

“Amyloid  $\beta$ -peptides interfere with mitochondrial preprotein import competence by a co-aggregation process”

## Supplementary figure legends

Figure S1. **Concentration dependency of A $\beta$  peptide-inhibition of mitochondrial import.** (A, B) Energized and intact mitochondria were incubated with mitochondrial precursor protein [<sup>35</sup>S]Su9(86)DHFR and the indicated amounts of A $\beta$ 40 (A) and A $\beta$ 42 (B) for 30 min at 30 °C. Half of the samples were incubated with trypsin (100  $\mu$ g/ml) to digest the precursor proteins not imported. Mitochondrial pellets and respective supernatants were loaded on tricine-SDS-PAGE followed by Western blot, digital autoradiography and immunodecoration against A $\beta$  peptides. *p*, precursor form; *m*, mature form; *L*, loading control; *Mock*, control reaction in absence of mitochondria. (C) Isolated mitochondria without  $\Delta\psi_{mit}$  were incubated with increasing amounts of A $\beta$ 40 and A $\beta$ 42 (as indicated) and precursor protein [<sup>35</sup>S]Su9(70)DHFR. (D) A $\beta$  peptide effect on translation. Rabbit reticulocyte lysate, Su9(70)DHFR mRNA, [<sup>35</sup>S]methionine were incubated with or without A $\beta$  peptides (3.5  $\mu$ M) at 30° C for 60 min. The translation was stop adding 8 mM cold methionine. The samples were analyzed by tricine-SDS-PAGE followed by Western blot and digital autoradiography.

Figure S2. **Effect of A $\beta$  peptides on mitochondrial respiratory chain complexes structure and composition.** Intact and energized mitochondria were treated with A $\beta$  peptides (3.5  $\mu$ M). Structure and composition of the mitochondrial respiratory chain complexes were analyzed by SDS-PAGE, BN-PAGE and Western blot. Before loading the gels, mitochondria were solubilized in a buffer containing 1% digitonin. Immunodecorations against components of respiratory complexes I, II, III, IV, and V were performed (see “Material and Methods”). Indicated are the bands representing the respective respiratory complexes or super-complexes.

Figure S3. **Co-aggregation between A $\beta$  peptides and the genuine mitochondrial precursor protein ornithine carbamoyltransferase (OTC).** Precursor protein [<sup>35</sup>S]OTC was incubated in import buffer in presence or absence of A $\beta$  peptides in the indicated amounts. After incubation, samples were analyzed by a filter retardation assay. Samples were filtered directly through cellulose acetate membrane and nitrocellulose membrane using a dot blot filtration unit as described in “Material and Methods” section. Proteins on both membranes were colored with Ponceau S followed by digital autoradiography to detect the precursor protein [<sup>35</sup>S]OTC signal and by immunodecoration to detect the A $\beta$  peptides.

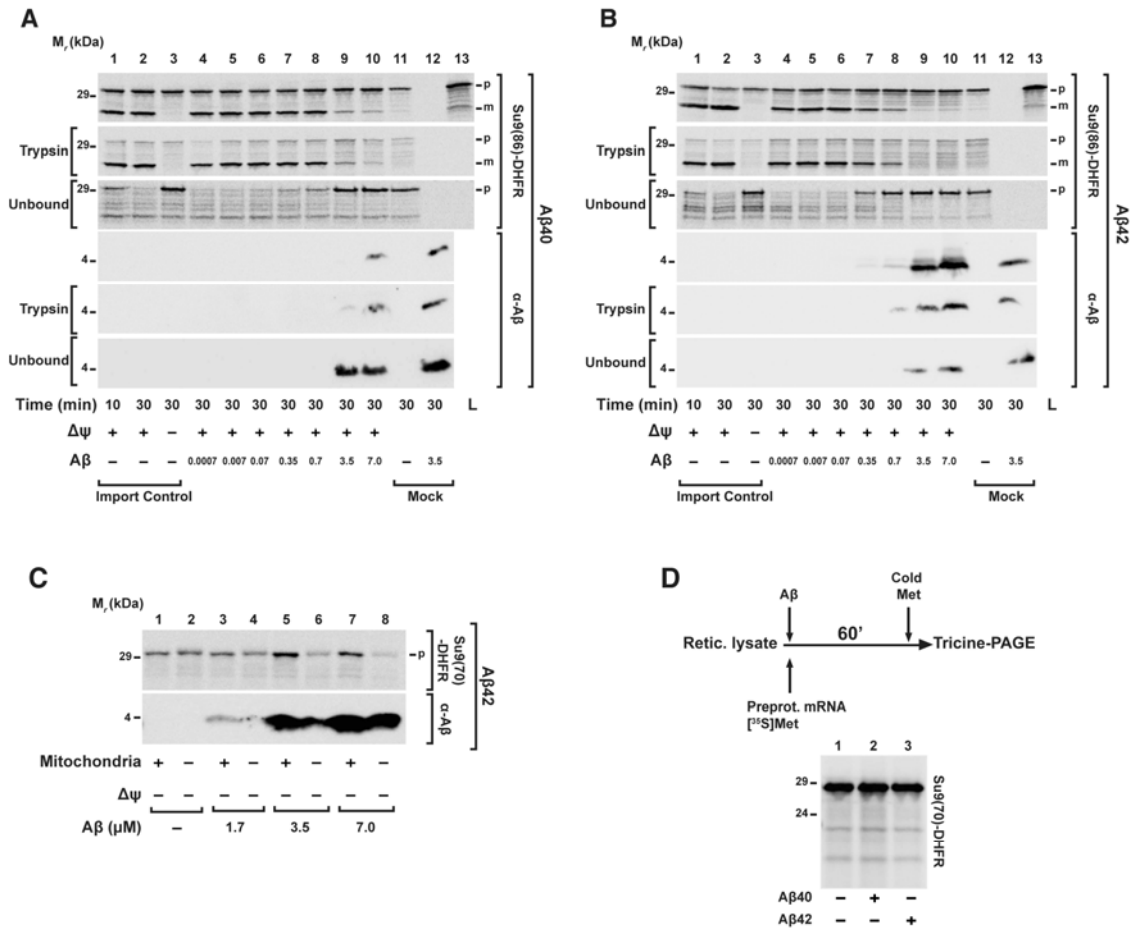

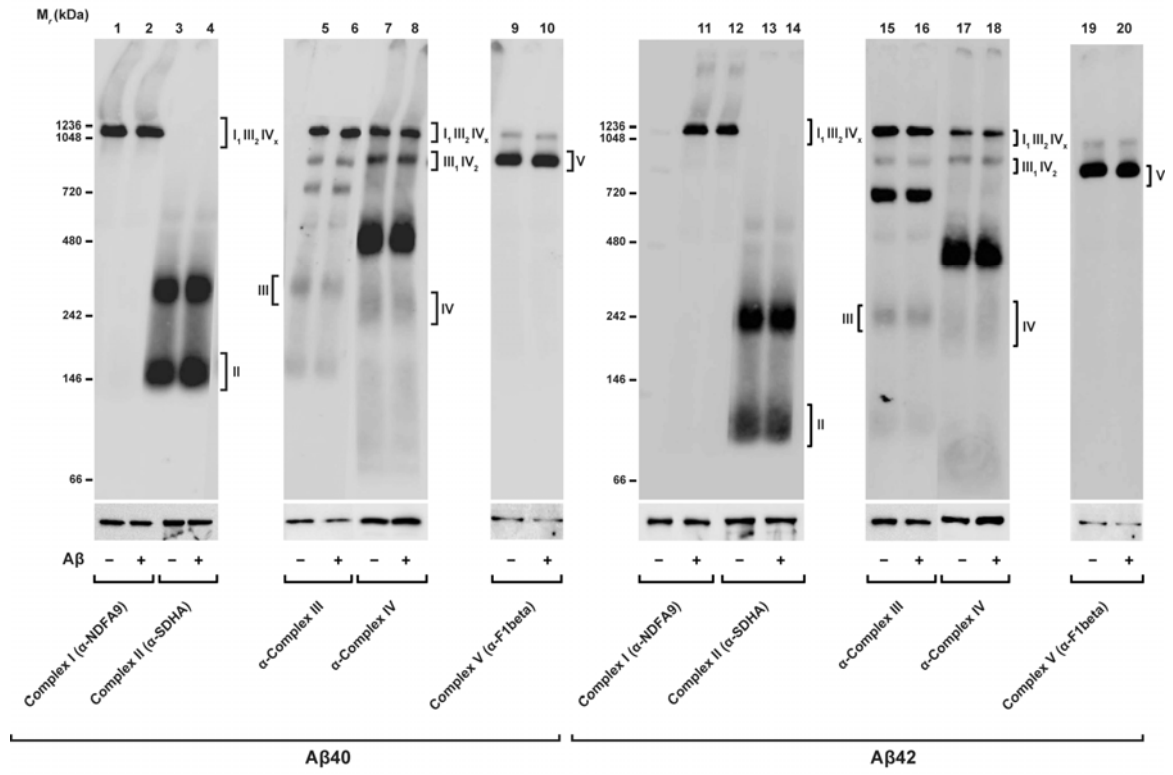

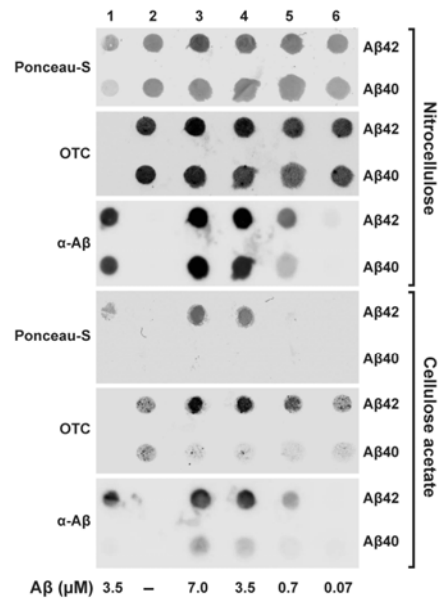

Cenini *et al.*, Supplm. Fig. S3
